# Supplementary material for: The European guideline on management of major bleeding and coagulopathy following trauma: fifth edition
Source: Springer Nature journal article supplement (doi:10.1186/s13054-019-2347-3), 2019-03-27
Supplement: MOESM1 [file 16579574]

## I. INITIAL RESUSCITATION AND PREVENTION OF FURTHER BLEEDING

Search performed 31.01.2018

824 hits

("Wounds and Injuries"[Mesh] OR "Trauma Severity Indices"[Mesh] OR injur\*[tiab] OR trauma\*[tiab] OR polytrauma\*[tiab]) AND ("Hemorrhage"[Mesh] OR "Blood Coagulation Disorders"[Mesh] OR "Disseminated Intravascular Coagulation"[Mesh] OR bleed\*[tiab] OR hemorrhag\*[tiab] OR haemorrhag\*[tiab] OR coagulation disorder\*[tiab] OR coagulopath\*[tiab] OR disseminated intravascular coagulation[tiab] OR DIC[tiab]) AND ("Resuscitation"[Mesh] OR "Tourniquets"[Mesh] OR "Intubation, Intratracheal"[Mesh] OR resuscitation\*[tiab] OR tourniquet\*[tiab] OR wound compression\*[tiab] OR ventilation\*[tiab] OR (tracheal [tiab] OR intratracheal[tiab] OR endotracheal[tiab] AND intubation\*[tiab]) OR triage[tiab] OR triage[mesh] OR overtriage[tiab] OR ((selecting[tiab] OR choosing[tiab] OR selection[tiab] OR choice[tiab] OR prioritize[tiab] OR prioritise[tiab] OR prioritizing[tiab]) AND (Hospital[tiab] OR hospitals[tiab] OR clinic[tiab] OR center[tiab] OR centre[tiab] OR clinics[tiab] OR centers[tiab] OR centres[tiab] OR „Emergency Service, Hospital”[mesh] OR trauma room\*[tiab] OR resuscitation area\*[tiab]))) AND humans[mesh] AND ("2015/02/01"[Date - Publication] : "3000"[Date - Publication]) NOT ("Comment" [Publication Type] OR "Letter" [Publication Type] OR "Editorial" [Publication Type])

## II. DIAGNOSIS AND MONITORING OF BLEEDING

Search performed 06.02.2018 (imaging)

3841 hits

("Wounds and Injuries"[Mesh] OR "Trauma Severity Indices"[Mesh] OR injur\*[tiab] OR trauma\*[tiab] OR polytrauma\*[tiab]) AND ("Hemorrhage"[Mesh] OR "Blood Coagulation Disorders"[Mesh] OR "Disseminated Intravascular Coagulation"[Mesh] OR bleed\*[tiab] OR hemorrhag\*[tiab] OR haemorrhag\*[tiab] OR coagulation disorder\*[tiab] OR coagulopath\*[tiab] OR disseminated intravascular coagulation[tiab] OR DIC[tiab]) AND ("Diagnosis"[Majr] OR "diagnosis" [Subheading] OR "Diagnostic Imaging"[Majr] OR "Tomography, X-Ray Computed"[Majr] OR "diagnostic imaging" [Subheading] OR "Ultrasonography"[Majr] OR "Signs and Symptoms"[Majr] OR "Monitoring, Physiologic"[Majr] OR clinical signs[tiab] OR ((diagnosis[tiab] OR diagnostic[tiab]) AND (tool[tiab] OR tools[tiab] OR score[tiab] OR scores[tiab])) OR ATLS shock classification[tiab] OR imaging[tiab] OR computer tomography[tiab] OR computer tomographies[tiab] OR CT[tiab] OR computed tomography[tiab] OR computed tomographies[tiab] OR ultrasonography[tiab] OR ultrasonographies[tiab] OR ultrasound[tiab] OR (hybrid[tiab] AND ((shock[tiab] OR resuscitation[tiab] OR operating[tiab]) AND (room[tiab] OR facility[tiab] OR facilities[tiab]))) AND humans[mesh] AND ("2015/02/01"[Date - Publication] : "3000"[Date - Publication]) NOT ("Comment" [Publication Type] OR "Letter" [Publication Type] OR "Editorial" [Publication Type])

Search performed 06.02.2018 (laboratory)

928 hits

("Wounds and Injuries"[Mesh] OR "Trauma Severity Indices"[Mesh] OR injur\*[tiab] OR trauma\*[tiab] OR polytrauma\*[tiab]) AND ("Hemorrhage"[Mesh] OR "Blood Coagulation Disorders"[Mesh] OR "Disseminated Intravascular Coagulation"[Mesh] OR bleed\*[tiab] OR hemorrhag\*[tiab] OR haemorrhag\*[tiab] OR coagulation disorder\*[tiab] OR coagulopath\*[tiab] OR disseminated intravascular coagulation[tiab] OR DIC[tiab]) AND ("Chemistry, Clinical"[Majr] OR "Clinical Chemistry Tests"[Majr] OR "Hematologic Tests"[Majr] OR "Blood Coagulation Tests"[Majr] OR "Point-of-Care Testing"[Majr] OR "Platelet Aggregation Inhibitors"[Mesh] OR "Antithrombins"[Mesh] OR "Factor Xa Inhibitors"[Mesh] OR ((laboratory[tiab] OR coagulation[tiab] OR point of care[tiab] OR platelet function[tiab]) AND (test[tiab] OR tests[tiab] OR testing[tiab] OR parameter[tiab] OR parameters[tiab] OR monitoring[tiab])) OR hematocrit[tiab] OR haematocrit[tiab] OR hemoglobin[tiab] OR haemoglobin [tiab] OR serum lactate[tiab] OR base deficit[tiab] OR D-dimer[tiab] OR (viscoelastic[tiab] AND (test[tiab] OR tests[tiab] OR testing[tiab] OR monitoring[tiab])) OR anticoagulan\*[tiab] OR DOACs[tiab] OR antiplatelet\*[tiab] OR antithrombin\*[tiab] OR anti factor Xa[tiab] OR ((platelet[tiab] OR thrombin[tiab] OR factor Xa[tiab]) AND inhibitor\*[tiab]) OR rivaroxaban[tiab] OR apixaban[tiab] OR edoxaban [tiab] OR betrixaban[tiab] OR dabigatran[tiab]) AND humans[mesh] AND ("2015/02/01"[Date - Publication] : "3000"[Date - Publication]) NOT ("Comment" [Publication Type] OR "Letter" [Publication Type] OR "Editorial" [Publication Type])

### III. TISSUE OXYGENATION, TYPE OF FLUID AND TEMPERATURE MANAGEMENT

Search performed 31.01.2018  
843 hits

("Wounds and Injuries"[Mesh] OR "Trauma Severity Indices"[Mesh] OR injur\*[tiab] OR trauma\*[tiab] OR polytrauma\*[tiab]) AND ("Hemorrhage"[Mesh] OR "Blood Coagulation Disorders"[Mesh] OR "Disseminated Intravascular Coagulation"[Mesh] OR bleed\*[tiab] OR hemorrhag\*[tiab] OR haemorrhag\*[tiab] OR coagulation disorder\*[tiab] OR coagulopath\*[tiab] OR disseminated intravascular coagulation[tiab] OR DIC[tiab]) AND ("Blood Pressure"[Mesh] OR "Hematocrit"[Mesh] OR "Hypotension"[Mesh] OR "Vasoconstrictor Agents"[Mesh] OR "Cardiotonic Agents"[Mesh] OR "Fluid Therapy"[Mesh] OR "Hypertonic Solutions"[Mesh] OR "Hypotonic Solutions"[Mesh] OR "Isotonic Solutions"[Mesh] OR "Colloids"[Mesh] OR "crystalloid solutions" [Supplementary Concept] OR "Electrolytes"[Mesh] OR "Sodium Chloride"[Mesh] OR "Plasma Substitutes"[Mesh] OR "Blood Substitutes"[Mesh] OR "Erythrocytes"[Mesh] OR "Erythrocyte Transfusion"[Mesh] OR "Epoetin Alfa"[Mesh] OR "Iron/therapy"[Mesh] OR "Hypothermia"[Mesh] OR "Hypothermia, Induced"[Mesh] OR blood pressure[tiab] OR hematocrit[tiab] OR haematocrit[tiab] OR hypotension[tiab] OR vasopressor\*[tiab] OR vasoconstrict\*[tiab] OR inotropic agent\*[tiab] OR cardiotonic drug\*[tiab] OR fluid therap\*[tiab] OR fluid resuscitation\*[tiab] OR volume resuscitation\*[tiab] OR fluid replacement\*[tiab] OR volume replacement\*[tiab] OR rehydration therap\*[tiab] OR fluid retention\*[tiab] OR sodium chlorid\*[tiab] OR saline solution\*[tiab] OR hypertonic solution\*[tiab] OR isotonic solution\*[tiab] OR hypotonic solution\*[tiab] OR crystalloid\*[tiab] OR colloid\*[tiab] OR electrolyte\*[tiab] OR plasma substitute\*[tiab] OR ringer solution\*[tiab] OR ringer's solution\*[tiab] OR ringer lactat\*[tiab] OR blood substitute\*[tiab] OR erythrocyte\*[tiab] OR erythrocyte transfusion\*[tiab] OR epoetin alfa[tiab] OR epoetin alpha[tiab] OR iron therap\*[tiab] OR hypotherm\*[tiab]) AND humans[mesh] AND ("2015/02/01"[Date - Publication] : "3000"[Date - Publication]) NOT ("Comment" [Publication Type] OR "Letter" [Publication Type] OR "Editorial" [Publication Type])

### IV. RAPID CONTROL OF BLEEDING

Search performed 31.01.2018 (general)  
322 hits

("Wounds and Injuries"[Mesh] OR "Trauma Severity Indices"[Mesh] OR injur\*[tiab] OR trauma\*[tiab] OR polytrauma\*[tiab]) AND ("Hemorrhage"[Mesh] OR "Blood Coagulation Disorders"[Mesh] OR "Disseminated Intravascular Coagulation"[Mesh] OR bleed\*[tiab] OR hemorrhag\*[tiab] OR haemorrhag\*[tiab] OR coagulation disorder\*[tiab] OR coagulopath\*[tiab] OR disseminated intravascular coagulation[tiab] OR DIC[tiab]) AND (damage control[tiab] OR abdominal packing[tiab] OR "Hemostatics"[Mesh] OR ((hemostatic[tiab] OR haemostatic[tiab]) AND (agent\*[tiab] OR drug\*[tiab]))) AND humans[mesh] AND ("2015/02/01"[Date - Publication] : "3000"[Date - Publication]) NOT ("Comment" [Publication Type] OR "Letter" [Publication Type] OR "Editorial" [Publication Type])

Search performed 31.01.2018 (pelvic injury)  
205 hits

("Wounds and Injuries"[Mesh] OR "Trauma Severity Indices"[Mesh] OR injur\*[tiab] OR trauma\*[tiab] OR polytrauma\*[tiab]) AND ("Hemorrhage"[Mesh] OR "Blood Coagulation Disorders"[Mesh] OR "Disseminated Intravascular Coagulation"[Mesh] OR bleed\*[tiab] OR hemorrhag\*[tiab] OR haemorrhag\*[tiab] OR coagulation disorder\*[tiab] OR coagulopath\*[tiab] OR disseminated intravascular coagulation[tiab] OR DIC[tiab]) AND ((pelvis [mesh] OR "pelvic bones" [mesh] OR "Pubic Symphysis" [mesh] OR "Sacroiliac Joint" [mesh] OR "hip fractures" [mesh] OR acetabulum [mesh] OR ((pelvic [ti] OR pelvis [ti] OR hip [ti] OR acetabul\* [ti] OR pubic\* [ti] OR sacroiliac\* [ti] OR symphys\* [ti]) AND (fracture\* [tiab] OR injur\* [tiab] OR trauma\* [tiab] OR disrupt\* [tiab]))) AND humans[mesh] AND ("2015/02/01"[Date - Publication] : "3000"[Date - Publication]) NOT ("Comment" [Publication Type] OR "Letter" [Publication Type] OR "Editorial" [Publication Type])

### V. INITIAL MANAGEMENT OF BLEEDING AND COAGULOPATHY

Search performed 31.01.2018  
1253 hits

("Wounds and Injuries"[Mesh] OR "Trauma Severity Indices"[Mesh] OR injur\*[tiab] OR trauma\*[tiab] OR polytrauma\*[tiab]) AND ("Hemorrhage"[Mesh] OR "Blood Coagulation Disorders"[Mesh] OR "Disseminated Intravascular Coagulation"[Mesh] OR bleed\*[tiab] OR hemorrhag\*[tiab] OR haemorrhag\*[tiab] OR coagulation disorder\*[tiab] OR coagulopath\*[tiab] OR disseminated intravascular coagulation[tiab] OR DIC[tiab]) AND ("Blood Coagulation"[Majr] OR "Hemostasis"[Majr] OR "Blood Coagulation Tests"[Majr] OR "Plasma"[Mesh] OR "Erythrocyte Transfusion"[Mesh] OR "Platelet Transfusion"[Mesh] OR "Fibrinogen"[Mesh] OR "Antifibrinolytic Agents"[Mesh] OR "Tranexamic Acid"[Mesh] OR coagula\*[tiab] OR hemosta\*[tiab] OR haemosta\*[tiab] OR ((laboratory[tiab] OR coagulation[tiab] OR point of care[tiab] OR platelet function[tiab]) AND (test[tiab] OR tests[tiab] OR testing[tiab] OR parameter[tiab] OR parameters[tiab] OR monitoring[tiab] OR tool[tiab] OR tools[tiab])) OR (viscoelastic[tiab] AND (test[tiab] OR tests[tiab] OR testing[tiab] OR monitoring[tiab])) OR ((plasma[tiab] OR FFP[tiab] OR erythrocyte\*[tiab] OR red blood cells[tiab] OR platelet\*[tiab] OR thrombocyte\*[tiab]) AND transfusion\*[tiab]) OR fibrinogen[tiab] OR (antifibrinolytic[tiab] AND (agent\*[tiab] OR drug\*[tiab]))) OR tranexamic acid[tiab]) AND humans[mesh] AND ("2015/02/01"[Date - Publication] : "3000"[Date - Publication]) NOT ("Comment" [Publication Type] OR "Letter" [Publication Type] OR "Editorial" [Publication Type])

## VI. FURTHER RESUSCITATION

Search performed 06.02.2018 (anticoagulants)  
533 hits

("Wounds and Injuries"[Mesh] OR "Trauma Severity Indices"[Mesh] OR injur\*[tiab] OR trauma\*[tiab] OR polytrauma\*[tiab]) AND ("Hemorrhage"[Mesh] OR "Blood Coagulation Disorders"[Mesh] OR "Disseminated Intravascular Coagulation"[Mesh] OR bleed\*[tiab] OR hemorrhag\*[tiab] OR haemorrhag\*[tiab] OR coagulation disorder\*[tiab] OR coagulopath\*[tiab] OR disseminated intravascular coagulation[tiab] OR DIC[tiab]) AND ("Platelet Aggregation Inhibitors"[Mesh] OR "Antithrombins"[Mesh] OR "Factor Xa Inhibitors"[Mesh] OR anticoagulan\*[tiab] OR DOACs[tiab] OR antiplatelet\*[tiab] OR antithrombin\*[tiab] OR anti factor Xa[tiab] OR ((platelet[tiab] OR thrombin[tiab] OR factor Xa[tiab]) AND inhibitor\*[tiab]) OR rivaroxaban[tiab] OR apixaban[tiab] OR edoxaban[tiab] OR betrixaban[tiab] OR dabigatran[tiab] OR TXA[tiab] OR idarucizumab[tiab] OR PCC[tiab] OR PCCs[tiab] OR prothrombin complex concentrate\*[tiab]) AND humans[mesh] AND ("2015/02/01"[Date - Publication] : "3000"[Date - Publication]) NOT ("Comment" [Publication Type] OR "Letter" [Publication Type] OR "Editorial" [Publication Type])

Search performed 06.02.2018 (coagulants)  
578 hits

("Wounds and Injuries"[Mesh] OR "Trauma Severity Indices"[Mesh] OR injur\*[tiab] OR trauma\*[tiab] OR polytrauma\*[tiab]) AND ("Hemorrhage"[Mesh] OR "Blood Coagulation Disorders"[Mesh] OR "Disseminated Intravascular Coagulation"[Mesh] OR bleed\*[tiab] OR hemorrhag\*[tiab] OR haemorrhag\*[tiab] OR coagulation disorder\*[tiab] OR coagulopath\*[tiab] OR disseminated intravascular coagulation[tiab] OR DIC[tiab]) AND ("Fibrinogen"[Mesh] OR "cryoprecipitate coagulum" [Supplementary Concept] OR "Blood Platelets"[Mesh] OR "Platelet Transfusion"[Mesh] OR "Calcium"[Mesh] OR "Calcium Chloride"[Mesh] OR "Hypocalcemia"[Mesh] OR "Deamino Arginine Vasopressin"[Mesh] OR "prothrombin complex concentrates" [Supplementary Concept] OR "recombinant FVIIa" [Supplementary Concept] OR "Intermittent Pneumatic Compression Devices"[Mesh] OR "Stockings, Compression"[Mesh] OR fibrinogen[tiab] OR cryoprecipitate\*[tiab] OR ((platelet\*[tiab] OR thrombocyte\*[tiab]) AND (transfusion\*[tiab] OR administration[tiab] OR substitution[tiab])) OR thrombocytopenia[tiab] OR thrombocytopaenia[tiab] OR (calcium[tiab] AND (transfusion\*[tiab] OR administration[tiab] OR treatment[tiab])) OR hypocalcemia[tiab] OR hypocalcaemia[tiab] OR desmopressin[tiab] OR PCC[tiab] OR PCCs[tiab] OR prothrombin complex concentrate\*[tiab] OR rFVIIa[tiab] OR recombinant factor VIIa[tiab] OR recombinant activated factor VII[tiab] OR recombinant activated coagulation factor VII[tiab] OR FXIII[tiab] OR factor XIII[tiab] OR thromboprophylaxis[tiab] OR intermittent pneumatic compression[tiab] OR stockings[tiab] OR dabigatran[tiab]) AND humans[mesh] AND ("2015/02/01"[Date - Publication] : "3000"[Date - Publication]) NOT ("Comment" [Publication Type] OR "Letter" [Publication Type] OR "Editorial" [Publication Type])

## VII. GUIDELINE IMPLEMENTATION AND QUALITY CONTROL

**The European guideline on management of major bleeding and coagulopathy following trauma: Fifth edition**  
Spahn DR, Bouillon B, Cerny V, Duranteau J, Filipescu D, Hunt BJ, Komadina R, Maegele M, Nardi G, Riddez L, Samama C-M, Vincent J-L, Rossaint R

Search performed 31.01.2018

953 hits

("Wounds and Injuries"[Mesh] OR "Trauma Severity Indices"[Mesh] OR injur\*[tiab] OR trauma\*[tiab] OR polytrauma\*[tiab]) AND ("Hemorrhage"[Mesh] OR "Blood Coagulation Disorders"[Mesh] OR "Disseminated Intravascular Coagulation"[Mesh] OR bleed\*[tiab] OR hemorrhag\*[tiab] OR haemorrhag\*[tiab] OR coagulation disorder\*[tiab] OR coagulopath\*[tiab] OR disseminated intravascular coagulation[tiab] OR DIC[tiab]) AND ("Practice Guidelines as Topic"[Mesh] OR "Clinical Protocols"[Mesh] OR "Guideline Adherence"[Mesh] OR "Evidence-Based Medicine"[Mesh] OR "Evidence-Based Emergency Medicine"[Mesh] OR "Evidence-Based Practice"[Mesh] OR "Patient Care Bundles"[Mesh] OR "Education"[Mesh] OR "Patient Simulation"[Mesh] OR "Practice Patterns, Physicians"[Mesh] OR guideline\*[tiab] OR protocol\*[tiab] OR evidence based[tiab] OR evidence-based[tiab] OR checklist\*[tiab] OR education\*[tiab] OR simulation\*[tiab] OR "treatment bundle"[tiab] OR "treatment bundles"[tiab] OR "patient care bundle"[tiab] OR "patient care bundles"[tiab] OR massive transfusion[tiab]) AND humans[mesh] AND ("2015/02/01"[Date - Publication] : "3000"[Date - Publication]) NOT ("Comment" [Publication Type] OR "Letter" [Publication Type] OR "Editorial" [Publication Type])
